# Supplementary material for: RNA-Seq reveals the existence of a CDKN1C-E2F1-TP53 axis that is altered in human T-cell lymphoblastic lymphomas
Source: PubMed Central journal article supplement (PMC5902834; doi:10.1186/s12885-018-4304-y), 2018-04-16
Supplement: 12885_2018_4304_MOESM1_ESM.pdf [file 12885_2018_4304_MOESM1_ESM.pdf]

**Supplementary Table 1. Characterization of the human sample collection in the exploratory cohort.** Lymphomas were diagnosed (see Characterization column) according to World Health Organization Classification of Hematological Malignancies and recommendations from the European

|                    | IDENTIFICATION CODE* | Age       | Tumor cells | Characterization           | qRT-PCR    |            |            | CDKN1C          | CDKN1C          | CDKN1C          | E2F1            | TP53            | TP53            | TP53            | TP53                |
|--------------------|----------------------|-----------|-------------|----------------------------|------------|------------|------------|-----------------|-----------------|-----------------|-----------------|-----------------|-----------------|-----------------|---------------------|
|                    |                      |           |             |                            | CDKN1C     | E2F1       | TP53       | ENST00000380725 | ENST00000414822 | ENST00000440480 | ENST00000343380 | ENST00000269305 | ENST00000420246 | ENST00000445888 | ENST00000504937 (Δ) |
|                    |                      |           |             |                            | CDKN1C-002 | CDKN1C-001 | CDKN1C-003 | E2F1-001        | TP53-001        | TP53-005        | TP53-002        | TP53-008        |                 |                 |                     |
| Exploratory cohort | 554                  | Adult     | >80%        | Cortical / Common T-LBL    | -3,625     | 4,214      | 0,31       | -2,80           | -4,60           | -1,81           | 1,31            | 1,28            | 0,16            | 0,28            | 0,74                |
|                    | 238                  | Adult     | >80%        | PreT / Immature T-LBL      | -2,766     | -0,761     | 0,536      | -2,66           | -4,30           | -4,76           | 0,46            | 0,49            | -0,73           | -0,53           | 0,81                |
|                    | 408                  | Adult     | >80%        | Cortical / Common T-LBL    | -2,795     | -0,434     | 0,028      | -3,53           | -2,15           | -4,42           | 0,05            | 0,46            | -1,01           | -0,47           | -0,01               |
|                    | 192                  | Adult     | 90%         | Cortical / Common T-LBL    | -5,38      | 1,769      | -0,78      | -2,82           | -3,29           | -4,32           | 1,46            | -0,71           | 1,17            | -1,33           | 2,65                |
|                    | 346                  | Adult     | 95%         | Cortical / Common T-LBL    | -4,473     | 2,78       | -0,184     | -2,41           | -25,99          | -2,00           | 2,05            | -9,74           | 0,21            | -3,80           | 3,26                |
|                    | 460                  | Pediatric | 70%         | Cortical / Common T-LBL    | -3,522     | 0,933      | -0,395     | -1,13           | -22,38          | -1,50           | 1,10            | -2,10           | 0,45            | -0,57           | 2,41                |
|                    | 840                  | Pediatric | >80%        | ProT / Immature T-LBL      | -3,988     | 1,104      | 0,659      | -3,52           | -2,69           | -4,43           | 1,66            | 1,32            | 0,97            | 0,52            | 1,26                |
|                    | 521                  | Pediatric | 90%         | Cortical / Common T-LBL    |            |            |            | -5,95           | -4,12           | -3,40           | 1,68            | 0,66            | 2,65            | 1,10            | -0,05               |
| Extended cohort    | 829                  | Adult     | —           | Immature T-LBL             | -3,023     | -0,436     | 0,171      |                 |                 |                 |                 |                 |                 |                 |                     |
|                    | 188                  | Adult     | —           | T-LBL                      | -3,251     | 1,046      | 0,046      |                 |                 |                 |                 |                 |                 |                 |                     |
|                    | 135                  | Adult     | —           | Medular / Common T-LBL     | -5,107     | 1,742      | -0,295     |                 |                 |                 |                 |                 |                 |                 |                     |
|                    | 080                  | Pediatric | —           | Medular / Common T-LBL     | -3,21      | 0,029      | -0,666     |                 |                 |                 |                 |                 |                 |                 |                     |
|                    | 104                  | Pediatric | —           | Cortical / Common T-LBL    | -4,975     | 1,015      | 1,773      |                 |                 |                 |                 |                 |                 |                 |                     |
|                    | 038                  | Pediatric | —           | T-LBL                      | -0,682     | 1,257      | 0,522      |                 |                 |                 |                 |                 |                 |                 |                     |
|                    | 101                  | Pediatric | —           | T-LBL                      | -3,736     | 1,704      | -1,689     |                 |                 |                 |                 |                 |                 |                 |                     |
|                    | 209                  | Pediatric | —           | T-LBL                      | -1,187     | 0,453      | 0,389      |                 |                 |                 |                 |                 |                 |                 |                     |
|                    | 639                  | Pediatric | 80%         | Medular / Common T-LBL     | -2,498     | -0,479     | 0,07       |                 |                 |                 |                 |                 |                 |                 |                     |
|                    | 001                  | Pediatric | —           | ProT-PreT / Immature T-LBL | -2,766     | 2,651      | 0,547      |                 |                 |                 |                 |                 |                 |                 |                     |

\*Identification of the biological samples of the Biobank will be subjected to a coding process. Each sample is assigned an identification code.
