# Supplementary material for: RNA-Seq reveals the existence of a CDKN1C-E2F1-TP53 axis that is altered in human T-cell lymphoblastic lymphomas
Source: PubMed Central journal article supplement (PMC5902834; doi:10.1186/s12885-018-4304-y), 2018-04-16

**Fig S1. Gaussian Kernel Density plot of miRGate Agreement Score of the miRNAs identified associated with the *CDKN1C*, *E2F1* and *TP53* genes.** Red dashed line represents the median value (1.04) of the Agreement Scores. A= Gaussian Kernel Density plot of miRGate Agreement Score of all the microRNAs; B= Gaussian Kernel Density plot of miRGate Agreement Score only for the microRNAs experimentally validated according with the information shown in miRGate..

**A**

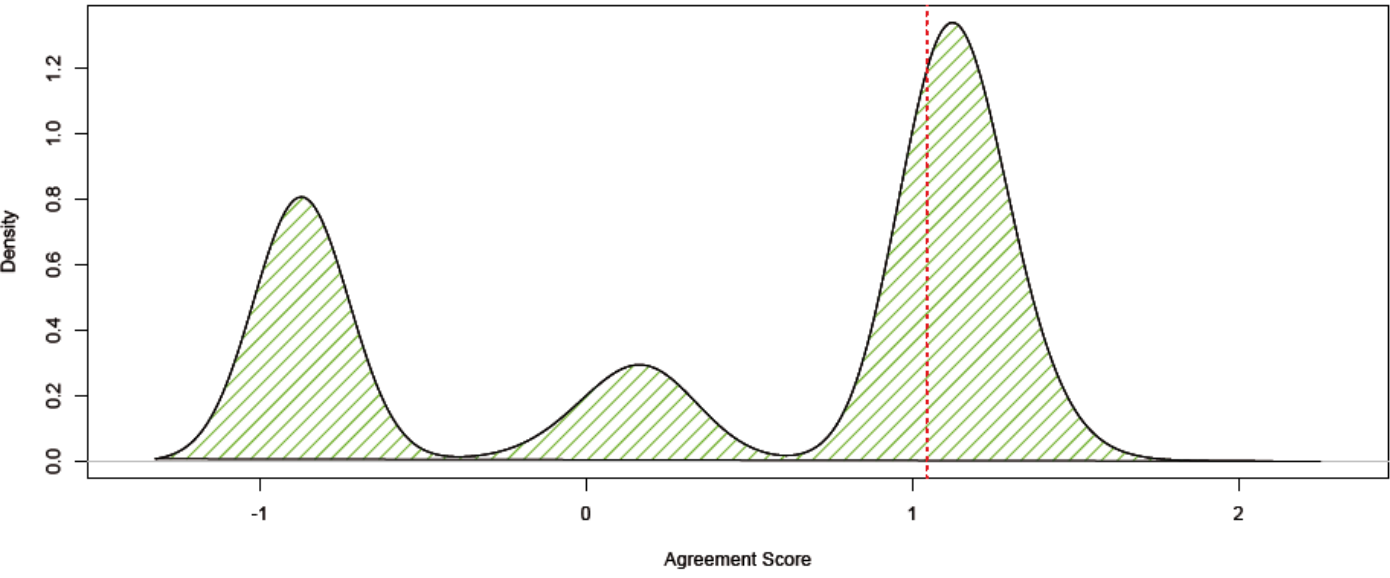

**B**

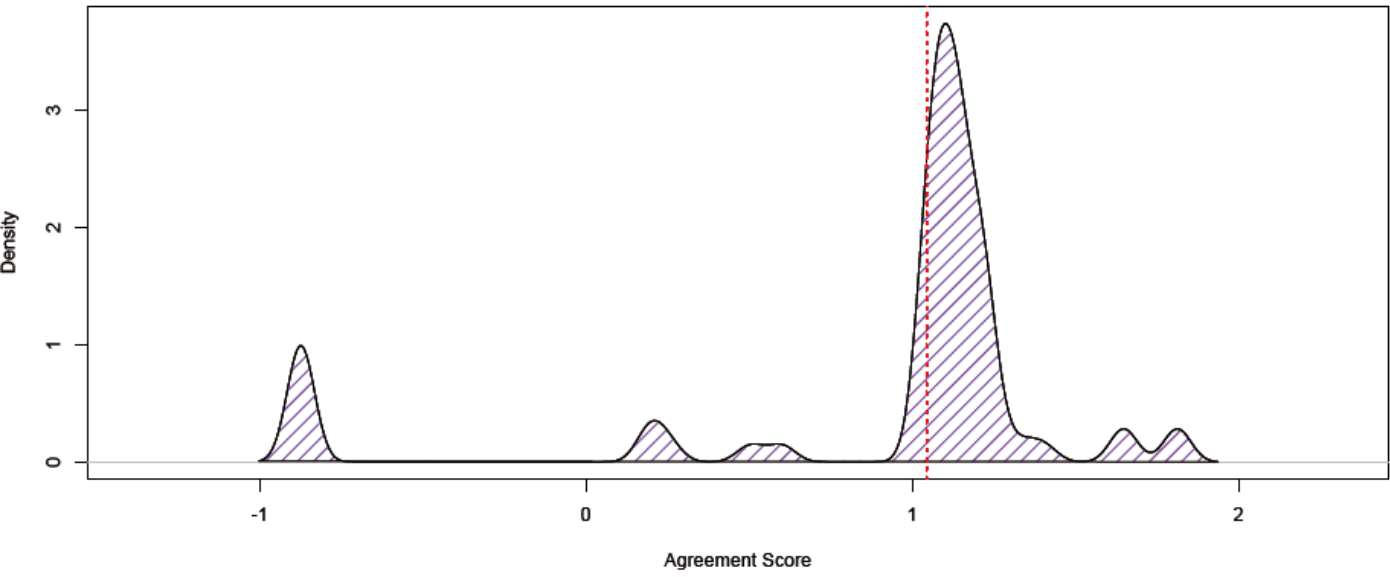

Supplement: 12885_2018_4304_MOESM2_ESM.pdf [file 12885_2018_4304_MOESM2_ESM.pdf]
