# Supplementary material for: RNA-Seq reveals the existence of a CDKN1C-E2F1-TP53 axis that is altered in human T-cell lymphoblastic lymphomas
Source: PubMed Central journal article supplement (PMC5902834; doi:10.1186/s12885-018-4304-y), 2018-04-16

**Fig S2. Gaussian Kernel Density Plot of the read counts for the miRNAs deregulated in any sample.** Black dashed line represents the median value (28.70) of the miRNA read counts of all the samples and red line represents the mean value of the controls read counts.

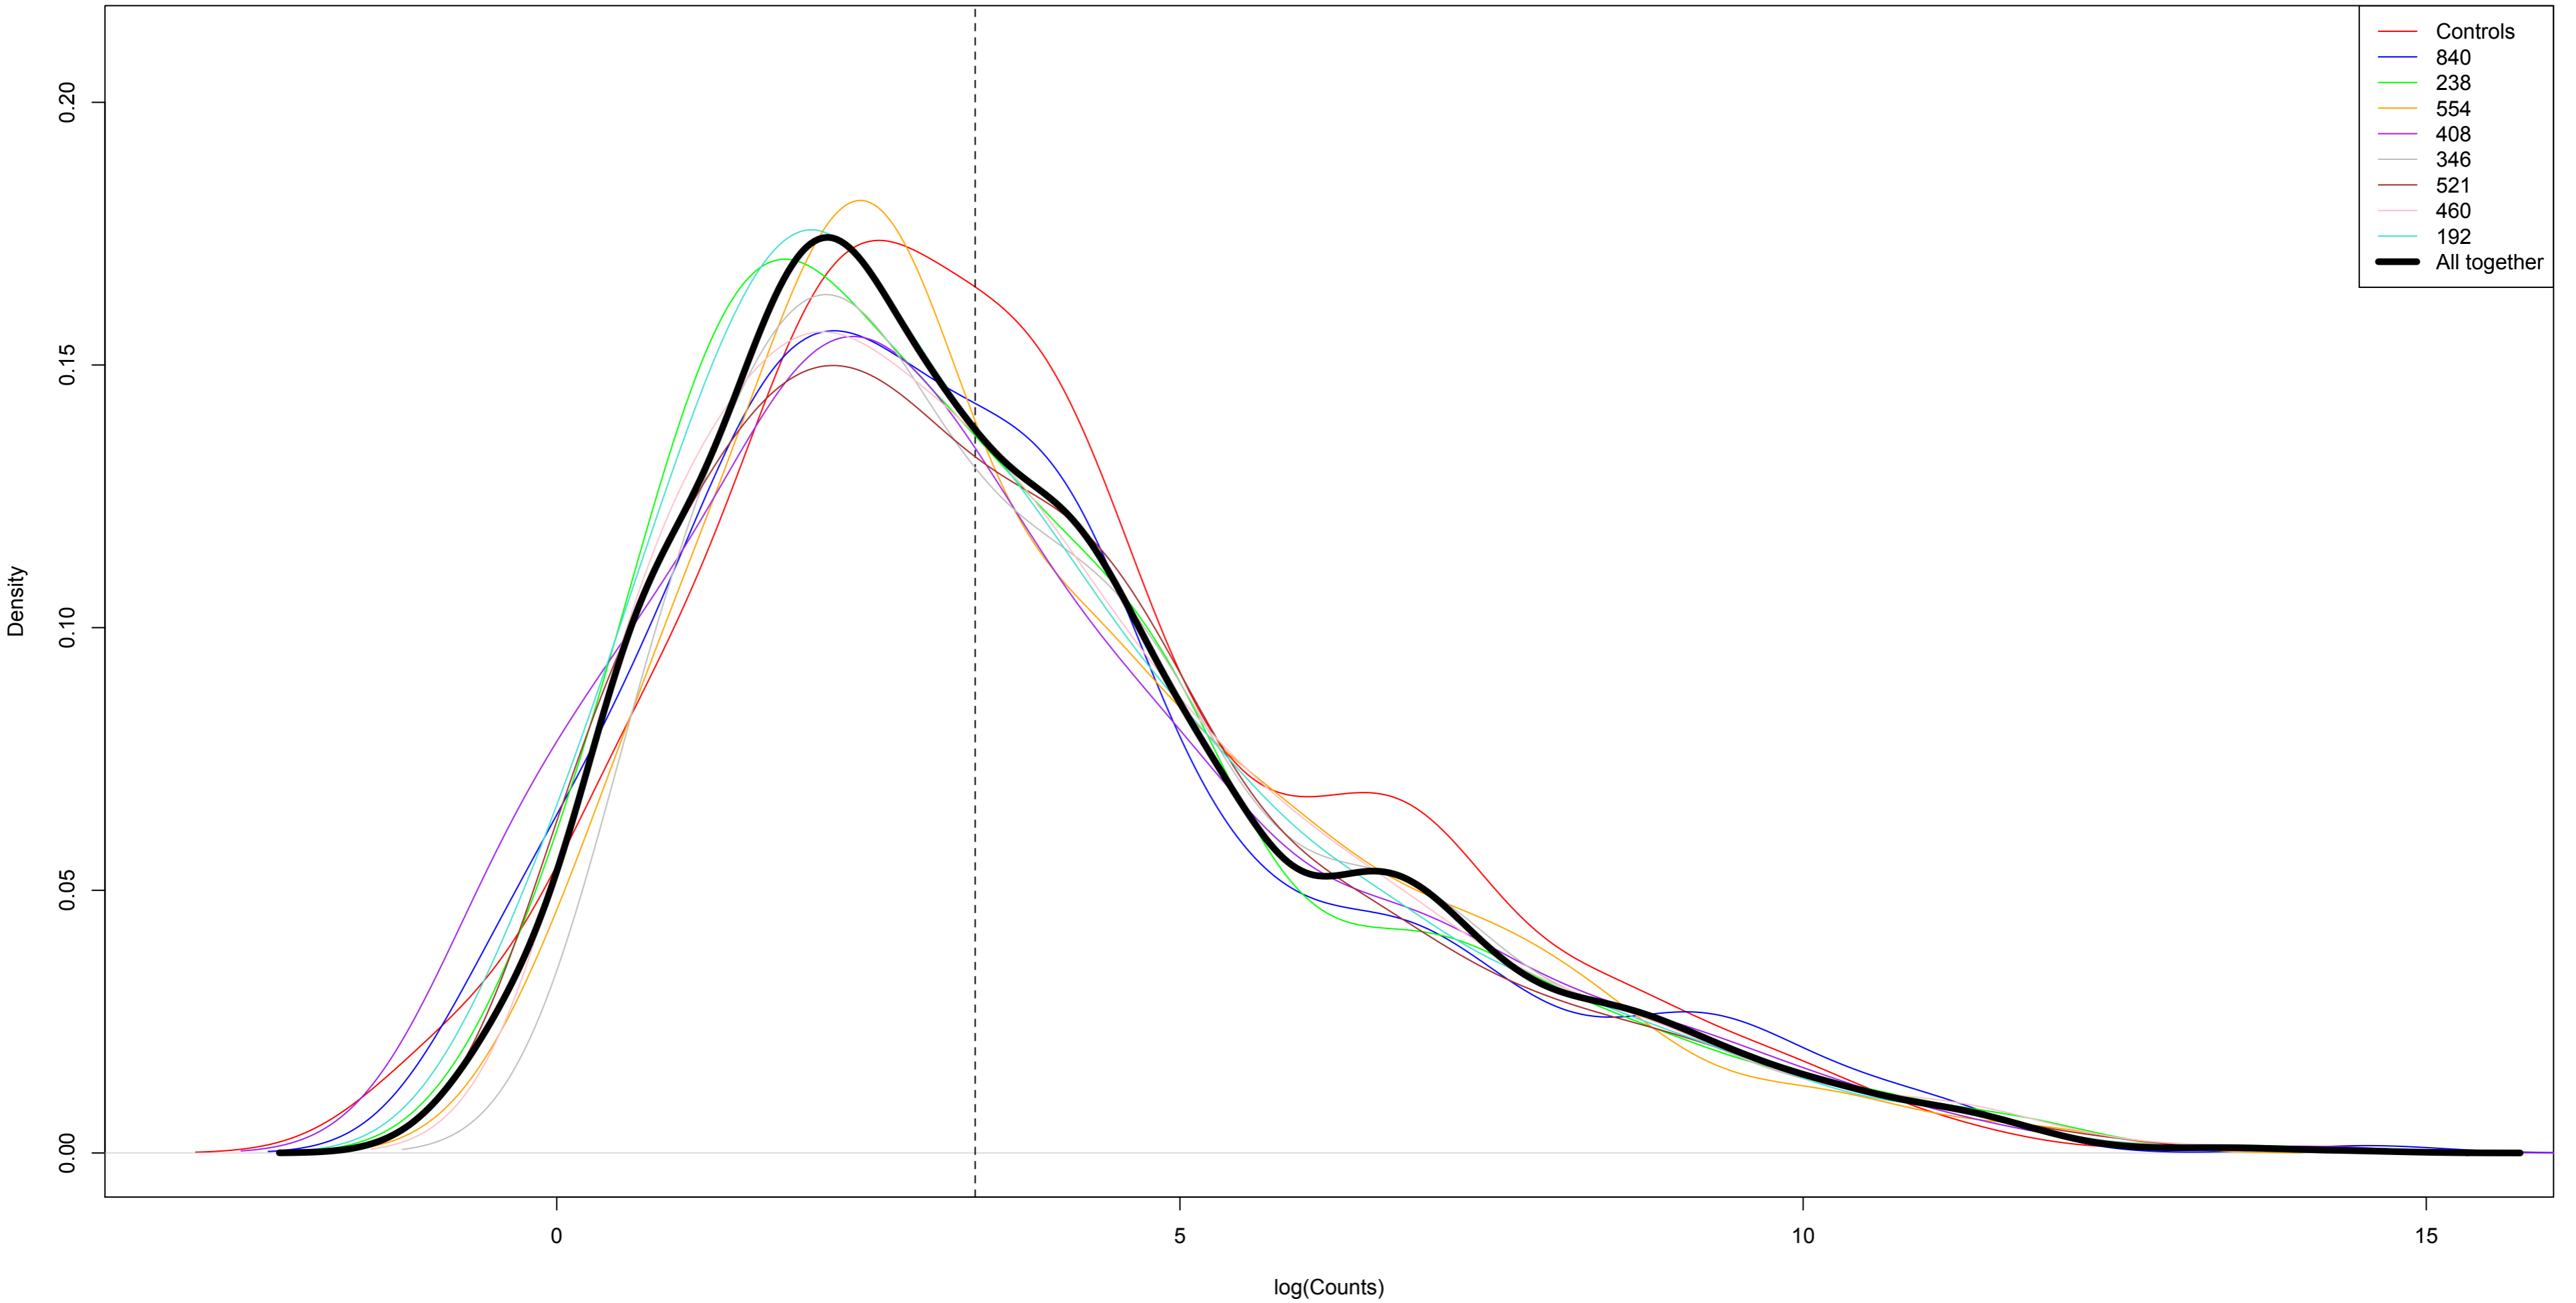

Supplement: 12885_2018_4304_MOESM3_ESM.pdf [file 12885_2018_4304_MOESM3_ESM.pdf]
