# Supplementary material for: RNA-Seq reveals the existence of a CDKN1C-E2F1-TP53 axis that is altered in human T-cell lymphoblastic lymphomas
Source: PubMed Central journal article supplement (PMC5902834; doi:10.1186/s12885-018-4304-y), 2018-04-16
Supplement: 12885_2018_4304_MOESM5_ESM.pdf [file 12885_2018_4304_MOESM5_ESM.pdf]

**Supplementary Table 3. Differential expression of mRNA between tumours and controls in the exploratory cohort by RNA-Seq.**

| Gene Symbol | Ensembl_gene_ID | Ensembl_transcript_ID | Locus                   | Tumor | FPKM_tumor | FPKM_control | log2FC |
|-------------|-----------------|-----------------------|-------------------------|-------|------------|--------------|--------|
| CDKN1C      | ENSG00000129757 | ENST00000380725       | chr11:2904442-2907111   | 840   | 0,764      | 8,779        | -3,52  |
| CDKN1C      | ENSG00000129757 | ENST00000380725       | chr11:2904442-2907111   | 192   | 1,240      | 8,779        | -2,82  |
| CDKN1C      | ENSG00000129757 | ENST00000380725       | chr11:2904442-2907111   | 460   | 4,009      | 8,779        | -1,13  |
| CDKN1C      | ENSG00000129757 | ENST00000380725       | chr11:2904442-2907111   | 346   | 1,653      | 8,779        | -2,41  |
| CDKN1C      | ENSG00000129757 | ENST00000380725       | chr11:2904442-2907111   | 521   | 0,142      | 8,779        | -5,95  |
| CDKN1C      | ENSG00000129757 | ENST00000380725       | chr11:2904442-2907111   | 238   | 1,390      | 8,779        | -2,66  |
| CDKN1C      | ENSG00000129757 | ENST00000380725       | chr11:2904442-2907111   | 554   | 1,265      | 8,779        | -2,80  |
| CDKN1C      | ENSG00000129757 | ENST00000380725       | chr11:2904442-2907111   | 408   | 0,758      | 8,779        | -3,53  |
| CDKN1C      | ENSG00000129757 | ENST00000414822       | chr11:2904442-2907111   | 840   | 0,399      | 2,577        | -2,69  |
| CDKN1C      | ENSG00000129757 | ENST00000414822       | chr11:2904442-2907111   | 192   | 0,264      | 2,577        | -3,29  |
| CDKN1C      | ENSG00000129757 | ENST00000414822       | chr11:2904442-2907111   | 460   | 0,000      | 2,577        | -22,38 |
| CDKN1C      | ENSG00000129757 | ENST00000414822       | chr11:2904442-2907111   | 346   | 0,000      | 2,577        | -25,99 |
| CDKN1C      | ENSG00000129757 | ENST00000414822       | chr11:2904442-2907111   | 521   | 0,148      | 2,577        | -4,12  |
| CDKN1C      | ENSG00000129757 | ENST00000414822       | chr11:2904442-2907111   | 238   | 0,131      | 2,577        | -4,30  |
| CDKN1C      | ENSG00000129757 | ENST00000414822       | chr11:2904442-2907111   | 554   | 0,106      | 2,577        | -4,60  |
| CDKN1C      | ENSG00000129757 | ENST00000414822       | chr11:2904442-2907111   | 408   | 0,579      | 2,577        | -2,15  |
| CDKN1C      | ENSG00000129757 | ENST00000440480       | chr11:2904442-2907111   | 840   | 0,258      | 5,560        | -4,43  |
| CDKN1C      | ENSG00000129757 | ENST00000440480       | chr11:2904442-2907111   | 192   | 0,278      | 5,560        | -4,32  |
| CDKN1C      | ENSG00000129757 | ENST00000440480       | chr11:2904442-2907111   | 460   | 1,970      | 5,560        | -1,50  |
| CDKN1C      | ENSG00000129757 | ENST00000440480       | chr11:2904442-2907111   | 346   | 1,386      | 5,560        | -2,00  |
| CDKN1C      | ENSG00000129757 | ENST00000440480       | chr11:2904442-2907111   | 521   | 0,527      | 5,560        | -3,40  |
| CDKN1C      | ENSG00000129757 | ENST00000440480       | chr11:2904442-2907111   | 238   | 0,205      | 5,560        | -4,76  |
| CDKN1C      | ENSG00000129757 | ENST00000440480       | chr11:2904442-2907111   | 554   | 1,590      | 5,560        | -1,81  |
| CDKN1C      | ENSG00000129757 | ENST00000440480       | chr11:2904442-2907111   | 408   | 0,260      | 5,560        | -4,42  |
| E2F1        | ENSG00000101412 | ENST00000343380       | chr20:32263488-32274210 | 840   | 37,098     | 11,766       | 1,66   |
| E2F1        | ENSG00000101412 | ENST00000343380       | chr20:32263488-32274210 | 192   | 32,386     | 11,766       | 1,46   |
| E2F1        | ENSG00000101412 | ENST00000343380       | chr20:32263488-32274210 | 460   | 25,223     | 11,766       | 1,10   |
| E2F1        | ENSG00000101412 | ENST00000343380       | chr20:32263488-32274210 | 346   | 48,739     | 11,766       | 2,05   |
| E2F1        | ENSG00000101412 | ENST00000343380       | chr20:32263488-32274210 | 521   | 37,583     | 11,766       | 1,68   |
| E2F1        | ENSG00000101412 | ENST00000343380       | chr20:32263488-32274210 | 238   | 16,158     | 11,766       | 0,46   |
| E2F1        | ENSG00000101412 | ENST00000343380       | chr20:32263488-32274210 | 554   | 29,140     | 11,766       | 1,31   |
| E2F1        | ENSG00000101412 | ENST00000343380       | chr20:32263488-32274210 | 408   | 12,157     | 11,766       | 0,05   |
| TP53        | ENSG00000141510 | ENST00000269305       | chr17:7565096-7606820   | 840   | 41,756     | 16,740       | 1,32   |
| TP53        | ENSG00000141510 | ENST00000269305       | chr17:7565096-7606820   | 192   | 10,228     | 16,740       | -0,71  |
| TP53        | ENSG00000141510 | ENST00000269305       | chr17:7565096-7606820   | 460   | 3,909      | 16,740       | -2,10  |
| TP53        | ENSG00000141510 | ENST00000269305       | chr17:7565096-7606820   | 346   | 0,020      | 16,740       | -9,74  |
| TP53        | ENSG00000141510 | ENST00000269305       | chr17:7565096-7606820   | 521   | 26,398     | 16,740       | 0,66   |
| TP53        | ENSG00000141510 | ENST00000269305       | chr17:7565096-7606820   | 238   | 23,495     | 16,740       | 0,49   |
| TP53        | ENSG00000141510 | ENST00000269305       | chr17:7565096-7606820   | 554   | 40,587     | 16,740       | 1,28   |
| TP53        | ENSG00000141510 | ENST00000269305       | chr17:7565096-7606820   | 408   | 23,087     | 16,740       | 0,46   |
| TP53        | ENSG00000141510 | ENST00000420246       | chr17:7565096-7606820   | 840   | 1,140      | 0,581        | 0,97   |
| TP53        | ENSG00000141510 | ENST00000420246       | chr17:7565096-7606820   | 192   | 1,304      | 0,581        | 1,17   |
| TP53        | ENSG00000141510 | ENST00000420246       | chr17:7565096-7606820   | 460   | 0,796      | 0,581        | 0,45   |
| TP53        | ENSG00000141510 | ENST00000420246       | chr17:7565096-7606820   | 346   | 0,670      | 0,581        | 0,21   |
| TP53        | ENSG00000141510 | ENST00000420246       | chr17:7565096-7606820   | 521   | 3,643      | 0,581        | 2,65   |
| TP53        | ENSG00000141510 | ENST00000420246       | chr17:7565096-7606820   | 238   | 0,350      | 0,581        | -0,73  |
| TP53        | ENSG00000141510 | ENST00000420246       | chr17:7565096-7606820   | 554   | 0,650      | 0,581        | 0,16   |
| TP53        | ENSG00000141510 | ENST00000420246       | chr17:7565096-7606820   | 408   | 0,288      | 0,581        | -1,01  |
| TP53        | ENSG00000141510 | ENST00000445888       | chr17:7565096-7606820   | 840   | 23,758     | 16,599       | 0,52   |
| TP53        | ENSG00000141510 | ENST00000445888       | chr17:7565096-7606820   | 192   | 6,595      | 16,599       | -1,33  |
| TP53        | ENSG00000141510 | ENST00000445888       | chr17:7565096-7606820   | 460   | 11,213     | 16,599       | -0,57  |
| TP53        | ENSG00000141510 | ENST00000445888       | chr17:7565096-7606820   | 346   | 1,194      | 16,599       | -3,80  |
| TP53        | ENSG00000141510 | ENST00000445888       | chr17:7565096-7606820   | 521   | 35,518     | 16,599       | 1,10   |
| TP53        | ENSG00000141510 | ENST00000445888       | chr17:7565096-7606820   | 238   | 11,457     | 16,599       | -0,53  |
| TP53        | ENSG00000141510 | ENST00000445888       | chr17:7565096-7606820   | 554   | 20,177     | 16,599       | 0,28   |
| TP53        | ENSG00000141510 | ENST00000445888       | chr17:7565096-7606820   | 408   | 11,944     | 16,599       | -0,47  |
| TP53        | ENSG00000141510 | ENST00000504937       | chr17:7565096-7606820   | 840   | 22,821     | 9,559        | 1,26   |
| TP53        | ENSG00000141510 | ENST00000504937       | chr17:7565096-7606820   | 192   | 60,176     | 9,559        | 2,65   |
| TP53        | ENSG00000141510 | ENST00000504937       | chr17:7565096-7606820   | 460   | 50,764     | 9,559        | 2,41   |
| TP53        | ENSG00000141510 | ENST00000504937       | chr17:7565096-7606820   | 346   | 91,511     | 9,559        | 3,26   |
| TP53        | ENSG00000141510 | ENST00000504937       | chr17:7565096-7606820   | 521   | 9,238      | 9,559        | -0,05  |
| TP53        | ENSG00000141510 | ENST00000504937       | chr17:7565096-7606820   | 238   | 16,812     | 9,559        | 0,81   |
| TP53        | ENSG00000141510 | ENST00000504937       | chr17:7565096-7606820   | 554   | 16,005     | 9,559        | 0,74   |
| TP53        | ENSG00000141510 | ENST00000504937       | chr17:7565096-7606820   | 408   | 9,463      | 9,559        | -0,01  |

Ensembl\_gene\_ID, Ensembl gene identifier; Ensembl\_transcript\_ID, Ensembl transcript isoform identifier; FPKM, Fragments per kilobase of transcript per million mapped fragments; log2FC, log2 Fold changes of expression levels between tumours and controls.
