# Supplementary material for: RNA-Seq reveals the existence of a CDKN1C-E2F1-TP53 axis that is altered in human T-cell lymphoblastic lymphomas
Source: PubMed Central journal article supplement (PMC5902834; doi:10.1186/s12885-018-4304-y), 2018-04-16
Supplement: 12885_2018_4304_MOESM6_ESM.pdf [file 12885_2018_4304_MOESM6_ESM.pdf]

Supplementary Table 4: Relative expression of CDKN1C, E2F1 and TP53 analyzed by qrtRT-PCR.

| Sample Cohort      | Sample                           | ENST                             | ENSG                             | Gene Symbol      | Housekeeping     | 2 <sup>Δ</sup> -Dct 2_control | 2 <sup>Δ</sup> -Dct 2_tumor | P value | Norm_1 | Norm_2  | log2FC |        |
|--------------------|----------------------------------|----------------------------------|----------------------------------|------------------|------------------|-------------------------------|-----------------------------|---------|--------|---------|--------|--------|
| Exploratory cohort | 554                              | ENSG00000129757                  | ENSG00000129757                  | CDKN1C           | b-actin          | 3,320                         | 0,270                       | 0,000   | 1,000  | 0,081   | -3,625 |        |
|                    |                                  | ENSG00000101412                  | ENSG00000101412                  | E2F1             | b2-microglobulin | 0,460                         | 8,540                       | 0,000   | 1,000  | 18,560  | 4,214  |        |
|                    |                                  | ENST00000269305; ENST00000445888 | ENSG00000141510                  | TP53             | b-actin          | 1,190                         | 1,470                       | 0,001   | 1,000  | 1,240   | 0,310  |        |
|                    | 238                              | ENST00000504937                  | ENSG00000141510                  | TP53             | b2-microglobulin | 0,370                         | 38,120                      | 0,001   | 1,000  | 103,020 | 6,686  |        |
|                    |                                  | ENSG00000129757                  | ENSG00000129757                  | CDKN1C           | b-actin          | 3,320                         | 0,490                       | 0,000   | 1,000  | 0,147   | -2,766 |        |
|                    |                                  | ENSG00000101412                  | ENSG00000101412                  | E2F1             | b2-microglobulin | 0,460                         | 0,270                       | 0,074   | 1,000  | 0,590   | -0,761 |        |
|                    | 408                              | ENST00000269305; ENST00000445888 | ENSG00000141510                  | TP53             | b-actin          | 1,190                         | 1,720                       | 0,001   | 1,000  | 1,450   | 0,536  |        |
|                    |                                  | ENST00000504937                  | ENSG00000141510                  | TP53             | b2-microglobulin | 0,370                         | 0,200                       | 0,062   | 1,000  | 0,540   | -0,888 |        |
|                    |                                  | ENSG00000129757                  | ENSG00000129757                  | CDKN1C           | b-actin          | 3,320                         | 0,480                       | 0,000   | 1,000  | 0,144   | -2,795 |        |
|                    | 192                              | ENST00000269305; ENST00000445888 | ENSG00000141510                  | E2F1             | b2-microglobulin | 0,460                         | 0,340                       | 0,178   | 1,000  | 0,740   | -0,434 |        |
|                    |                                  | ENST00000504937                  | ENSG00000141510                  | TP53             | b-actin          | 1,190                         | 1,210                       | 0,939   | 1,000  | 1,020   | 0,028  |        |
|                    |                                  | ENSG00000129757                  | ENSG00000129757                  | TP53             | b2-microglobulin | 0,370                         | 0,380                       | 0,742   | 1,000  | 1,020   | 0,038  |        |
|                    | 460                              | ENSG00000101412                  | ENSG00000129757                  | CDKN1C           | b-actin          | 3,320                         | 0,080                       | 0,000   | 1,000  | 0,024   | -5,380 |        |
|                    |                                  | ENST00000269305; ENST00000445888 | ENSG00000141510                  | E2F1             | b2-microglobulin | 0,460                         | 1,570                       | 0,000   | 1,000  | 3,410   | 1,769  |        |
|                    |                                  | ENST00000504937                  | ENSG00000141510                  | TP53             | b-actin          | 1,190                         | 0,690                       | 0,001   | 1,000  | 0,580   | -0,780 |        |
|                    | 346                              | ENST00000504937                  | ENSG00000141510                  | TP53             | b2-microglobulin | 0,370                         | 5,040                       | 0,000   | 1,000  | 13,620  | 3,767  |        |
|                    |                                  | ENSG00000129757                  | ENSG00000129757                  | CDKN1C           | b-actin          | 3,320                         | 0,290                       | 0,000   | 1,000  | 0,087   | -3,522 |        |
|                    |                                  | ENST00000269305; ENST00000445888 | ENSG00000141510                  | E2F1             | b2-microglobulin | 0,460                         | 0,880                       | 0,025   | 1,000  | 1,910   | 0,933  |        |
|                    | 840                              | ENST00000504937                  | ENSG00000141510                  | TP53             | b-actin          | 1,190                         | 0,920                       | 0,005   | 1,000  | 0,760   | -0,395 |        |
|                    |                                  | ENSG00000129757                  | ENSG00000129757                  | TP53             | b2-microglobulin | 0,370                         | 3,630                       | 0,000   | 1,000  | 9,810   | 3,294  |        |
|                    |                                  | ENSG00000101412                  | ENSG00000129757                  | CDKN1C           | b-actin          | 3,320                         | 0,150                       | 0,000   | 1,000  | 0,045   | -4,473 |        |
|                    | Extended cohort                  | 829                              | ENST00000269305; ENST00000445888 | ENSG00000141510  | TP53             | b-actin                       | 1,190                       | 1,340   | 0,014  | 1,000   | 1,126  | 0,171  |
|                    |                                  |                                  | ENST00000504937                  | ENSG00000141510  | TP53             | b2-microglobulin              | 0,370                       | 0,250   | 0,009  | 1,000   | 0,675  | -0,401 |
|                    |                                  |                                  | ENSG00000129757                  | ENSG00000129757  | CDKN1C           | b-actin                       | 3,320                       | 0,350   | 0,000  | 1,000   | 0,105  | -3,251 |
| 188                |                                  | ENSG00000101412                  | ENSG00000101412                  | E2F1             | b2-microglobulin | 0,460                         | 0,950                       | 0,003   | 1,000  | 2,065   | 1,046  |        |
|                    |                                  | ENST00000269305; ENST00000445888 | ENSG00000141510                  | TP53             | b-actin          | 1,190                         | 1,230                       | 0,267   | 1,000  | 1,033   | 0,046  |        |
|                    |                                  | ENST00000504937                  | ENSG00000141510                  | TP53             | b2-microglobulin | 0,370                         | 1,950                       | 0,001   | 1,000  | 5,270   | 2,397  |        |
| 080                |                                  | ENSG00000129757                  | ENSG00000129757                  | CDKN1C           | b-actin          | 3,320                         | 0,360                       | 0,000   | 1,000  | 0,108   | -3,210 |        |
|                    |                                  | ENST00000269305; ENST00000445888 | ENSG00000141510                  | E2F1             | b2-microglobulin | 0,460                         | 0,470                       | 0,957   | 1,000  | 1,021   | 0,029  |        |
|                    |                                  | ENST00000504937                  | ENSG00000141510                  | TP53             | b-actin          | 1,190                         | 0,750                       | 0,000   | 1,000  | 0,630   | -0,666 |        |
| 135                |                                  | ENST00000269305; ENST00000445888 | ENSG00000141510                  | TP53             | b2-microglobulin | 0,370                         | 1,090                       | 0,000   | 1,000  | 2,945   | 1,558  |        |
|                    |                                  | ENST00000504937                  | ENSG00000129757                  | CDKN1C           | b-actin          | 3,320                         | 0,130                       | 0,000   | 1,000  | 0,039   | -5,107 |        |
|                    |                                  | ENSG00000101412                  | ENSG00000101412                  | E2F1             | b2-microglobulin | 0,460                         | 1,540                       | 0,004   | 1,000  | 3,347   | 1,742  |        |
| 104                |                                  | ENST00000269305; ENST00000445888 | ENSG00000141510                  | TP53             | b-actin          | 1,190                         | 0,970                       | 0,002   | 1,000  | 0,815   | -0,295 |        |
|                    |                                  | ENST00000504937                  | ENSG00000141510                  | TP53             | b2-microglobulin | 0,370                         | 0,570                       | 0,002   | 1,000  | 1,540   | 0,622  |        |
|                    |                                  | ENSG00000129757                  | ENSG00000129757                  | CDKN1C           | b-actin          | 3,320                         | 0,120                       | 0,000   | 1,000  | 0,036   | -4,975 |        |
| 038                |                                  | ENST00000269305; ENST00000445888 | ENSG00000141510                  | E2F1             | b2-microglobulin | 0,460                         | 0,930                       | 0,005   | 1,000  | 2,021   | 1,015  |        |
|                    |                                  | ENST00000504937                  | ENSG00000141510                  | TP53             | b-actin          | 1,190                         | 4,070                       | 0,000   | 1,000  | 3,420   | 1,773  |        |
|                    |                                  | ENSG00000101412                  | ENSG00000141510                  | TP53             | b2-microglobulin | 0,370                         | 11,170                      | 0,000   | 1,000  | 30,189  | 4,915  |        |
| 101                |                                  | ENST00000504937                  | ENSG00000129757                  | CDKN1C           | b-actin          | 3,320                         | 2,070                       | 0,000   | 1,000  | 0,623   | -0,682 |        |
|                    |                                  | ENSG00000101412                  | ENSG00000101412                  | E2F1             | b2-microglobulin | 0,460                         | 1,100                       | 0,001   | 1,000  | 2,391   | 1,257  |        |
|                    |                                  | ENST00000269305; ENST00000445888 | ENSG00000141510                  | TP53             | b-actin          | 1,190                         | 1,710                       | 0,000   | 1,000  | 1,436   | 0,522  |        |
| 209                |                                  | ENST00000504937                  | ENSG00000141510                  | TP53             | b2-microglobulin | 0,370                         | 0,230                       | 0,006   | 1,000  | 0,621   | -0,687 |        |
|                    |                                  | ENSG00000129757                  | ENSG00000129757                  | CDKN1C           | b-actin          | 3,320                         | 0,250                       | 0,000   | 1,000  | 0,075   | -3,736 |        |
|                    |                                  | ENST00000269305; ENST00000445888 | ENSG00000141510                  | E2F1             | b2-microglobulin | 0,460                         | 1,500                       | 0,002   | 1,000  | 3,260   | 1,704  |        |
| 639                | ENST00000504937                  | ENSG00000141510                  | TP53                             | b-actin          | 1,190            | 0,370                         | 0,000                       | 1,000   | 0,310  | -1,689  |        |        |
|                    | ENSG00000129757                  | ENSG00000141510                  | TP53                             | b2-microglobulin | 0,370            | 32,310                        | 0,001                       | 1,000   | 87,320 | 6,448   |        |        |
|                    | ENSG00000101412                  | ENSG00000129757                  | CDKN1C                           | b-actin          | 3,320            | 1,460                         | 0,000                       | 1,000   | 0,439  | -1,187  |        |        |
| 001                | ENST00000269305; ENST00000445888 | ENSG00000141510                  | E2F1                             | b2-microglobulin | 0,460            | 0,630                         | 0,094                       | 1,000   | 1,369  | 0,453   |        |        |
|                    | ENST00000504937                  | ENSG00000141510                  | TP53                             | b-actin          | 1,190            | 1,560                         | 0,002                       | 1,000   | 1,310  | 0,389   |        |        |
|                    | ENSG00000101412                  | ENSG00000141510                  | TP53                             | b2-microglobulin | 0,370            | 1,770                         | 0,000                       | 1,000   | 4,783  | 2,257   |        |        |
| 001                | ENST00000269305; ENST00000445888 | ENSG00000141510                  | E2F1                             | b2-microglobulin | 0,460            | 0,590                         | 0,000                       | 1,000   | 0,177  | -2,498  |        |        |
|                    | ENST00000504937                  | ENSG00000141510                  | E2F1                             | b2-microglobulin | 0,460            | 0,330                         | 0,143                       | 1,000   | 0,717  | -0,479  |        |        |
|                    | ENSG00000101412                  | ENSG00000141510                  | TP53                             | b-actin          | 1,190            | 1,250                         | 0,099                       | 1,000   | 1,050  | 0,070   |        |        |
| 001                | ENST00000269305; ENST00000445888 | ENSG00000141510                  | TP53                             | b2-microglobulin | 0,370            | 3,760                         | 0,000                       | 1,000   | 10,160 | 3,344   |        |        |
|                    | ENST00000504937                  | ENSG00000129757                  | CDKN1C                           | b-actin          | 3,320            | 0,490                         | 0,000                       | 1,000   | 0,147  | -2,766  |        |        |
|                    | ENSG00000101412                  | ENSG00000101412                  | E2F1                             | b2-microglobulin | 0,460            | 2,890                         | 0,006                       | 1,000   | 6,282  | 2,651   |        |        |
| 001                | ENST00000269305; ENST00000445888 | ENSG00000141510                  | TP53                             | b-actin          | 1,190            | 1,740                         | 0,000                       | 1,000   | 1,462  | 0,547   |        |        |
|                    | ENST00000504937                  | ENSG00000141510                  | TP53                             | b2-microglobulin | 0,370            | 1,470                         | 0,000                       | 1,000   | 3,972  | 1,989   |        |        |

Relative expression values were calculated as the mRNA amount of each gene relative to that of either β-actin or β2 microglobulin (used as reference) and normalized to the relative expression of normal control samples. 2<sup>Δ</sup>-Dct 2 numbers indicate mean expression values analysed by the 2<sup>Δ</sup>DDct method obtained from three independent experiments in foetal thymuses and each tumour sample. Norm\_1 and Norm\_2 values represent normalized 2<sup>Δ</sup>-Dct 2 mean values. log2FC denotes the log-transformed (base 2) fold change normalized value of expression in each tumour sample relative to controls (foetal thymuses).
