# Supplementary material for: RNA-Seq reveals the existence of a CDKN1C-E2F1-TP53 axis that is altered in human T-cell lymphoblastic lymphomas
Source: PubMed Central journal article supplement (PMC5902834; doi:10.1186/s12885-018-4304-y), 2018-04-16
Supplement: 12885_2018_4304_MOESM7_ESM.pdf [file 12885_2018_4304_MOESM7_ESM.pdf]

Supplementary Table 5 - Complete list of genetic variants for TP53 gene determined by targeted deep sequencing in the T-LBL samples.

| IFT | PolyPhen2 | IFT | MutationTaster | MutationAssessor | FATHMM | MetaVM | Occurrences | hgMD                            | PROVEAN                    | # locus | type           | ref          | length | genotype        | posite | coverage | allele_coverage | maf       | gene    | transcript  | location    | function | codon    | exon | protein     | coding     | utr      | polyphen | grantham | normalisedA1 | S000names | cosmic | dbpup                                                                                | drugbank                                                                             | gn                       | lmm                      | lfa                      | phabp                                                                 |                  |                  |  |  |
|-----|-----------|-----|----------------|------------------|--------|--------|-------------|---------------------------------|----------------------------|---------|----------------|--------------|--------|-----------------|--------|----------|-----------------|-----------|---------|-------------|-------------|----------|----------|------|-------------|------------|----------|----------|----------|--------------|-----------|--------|--------------------------------------------------------------------------------------|--------------------------------------------------------------------------------------|--------------------------|--------------------------|--------------------------|-----------------------------------------------------------------------|------------------|------------------|--|--|
| S34 |           |     |                |                  |        |        |             | 17_757407_3055_A_C              | 17_757407_A.C              | 1       | A/C            | A            | 1      | A/C             |        | 1525     | 352,673         | 0.164     | TP53    | NM_000461.5 | intronic    |          |          |      |             |            |          |          |          |              |           |        |                                                                                      |                                                                                      | 17_757407_P07710.P07820  | 1                        | 1.48                     |                                                                       |                  |                  |  |  |
|     |           |     |                |                  |        |        |             | 17_757407_3056_G_A              | 17_757407_G.A              | 1       | G/A            | G            | 1      | G/A             |        | 1535     | 371,662         | 0.164     | TP53    | NM_000461.5 | intronic    |          |          |      |             |            |          |          |          |              |           |        |                                                                                      |                                                                                      | 17_757407_P07710.P07820  | 1                        | 0.16                     |                                                                       |                  |                  |  |  |
|     |           |     |                |                  |        |        |             | 17_7579470_3448_CGG_CGC         | 17_7579470_CGG.CGC         | 1       | CGG/CGC        | GGG          | 1      | CGG/CGC         |        | 583      | 296,287,050     | 0.39800   | TP53    | NM_000461.5 | exonic      | missense | CGC      | 4    | p.Pro72Arg  | C.215C>G   |          |          | 103.0    | C            |           |        | 43787_18569_1268312_1268311_96366_45286-8<br>13077_44252_44466_138925_138926_46058-8 | n1042522_n56275308                                                                   |                          |                          | 17_7579470_P07710.P07820 | 1                                                                     | 1.14, 6.68, 1.36 |                  |  |  |
| S38 |           |     |                |                  |        |        |             | 17_7579470_3458_CGG_CGC         | 17_7579470_CGG.CGC         | 1       | CGG/CGC        | GGG          | 1      | CGG/CGC         |        | 583      | 11,790,050      | 0.39800   | TP53    | NM_000461.5 | exonic      | missense | CGC      | 4    | p.Pro72Arg  | C.215C>G   |          |          | 103.0    | C            |           |        | 43787_18569_1268312_1268311_96366_45286-8<br>13077_44252_44466_138925_138926_46058-8 | n1042522_n56275308                                                                   |                          |                          | 17_7579470_P07710.P07820 | 1                                                                     | 1.14, 6.68, 1.36 |                  |  |  |
| S39 |           |     |                |                  |        |        |             | 17_7579470_3457_G_T             | 17_7579470_G.T             | 1       | G/T            | G            | 1      | G/T             |        | 1232     | 923,603         | 0.073     | TP53    | NM_000461.5 | intronic    |          |          |      |             |            |          |          |          |              |           |        |                                                                                      |                                                                                      | 17_7579470_P07710.P07820 | 1                        | 0.7                      |                                                                       |                  |                  |  |  |
| S40 |           |     |                |                  |        |        |             | 17_7579483_3458_CCCCAGCCCAAGT_C | 17_7579483_CCCCAGCCCAAGT.C | 12      | CCCAGCCCAAGT/C | CCCAGCCCAAGT | 16     | CCCCAGCCCAAGT/C |        | 2417     | 2007,41         | 0.153     | TP53    | NM_000461.5 | intronic    |          |          |      |             |            |          |          |          |              |           |        |                                                                                      |                                                                                      |                          | 17_7579483_P07710.P07820 | 1                        | 2.36, 0.13, 0.39, 1.0, 1.96, 1.18, 0.8, 0.6, 46.3, 0.6, 0.7, 0.3, 0.8 |                  |                  |  |  |
| S42 |           |     |                |                  |        |        |             | 17_7579446_3302_T_C             | 17_7579446_T.C             | 1       | T/C            | T            | 1      | T/C             |        | 77       | 49,24           | 0.0       | TP53    | NM_000461.5 | intronic    |          |          |      |             |            |          |          |          |              |           |        |                                                                                      |                                                                                      |                          | 17_7579446_P07710.P07820 | 1                        | 6.3                                                                   |                  |                  |  |  |
|     |           |     |                |                  |        |        |             | 17_7579503_3308_C_A             | 17_7579503_C.A             | 1       | G/A            | G            | 1      | G/A             |        | 140      | 137,50          |           | TP53    | NM_000461.5 | exonic      | missense | TTC      | 5    | p.Val148Leu | C.427D>T   | 0.12     | 0.401    | 32.0     | A            |           |        | 44904_46078_40958_220756_166439_220753-4<br>43787_220753_220754_46053_43878          |                                                                                      |                          |                          | 17_7579503_P07710.P07820 | 1                                                                     | 1.45             |                  |  |  |
|     |           |     |                |                  |        |        |             | 17_7579470_3401_CGG_CGC         | 17_7579470_CGG.CGC         | 1       | CGG/CGC        | GGG          | 1      | CGG/CGC         |        | 535,45   | 153             | 69,813,00 | 0.39800 | TP53        | NM_000461.5 | exonic   | missense | CGC  | 4           | p.Pro72Arg | C.215C>G |          |          | 103.0        | C         |        |                                                                                      | 43787_18569_1268312_1268311_96366_45286-8<br>13077_44252_44466_138925_138926_46058-8 | n1042522_n56275308       |                          |                          | 17_7579470_P07710.P07820                                              | 1                | 1.14, 6.68, 1.36 |  |  |

| chr | start  | end    | strand | transcript      | transcript_id   | cds_start           | cds_end | feature | score | name | source | score | name | source | score | name | source |
|-----|--------|--------|--------|-----------------|-----------------|---------------------|---------|---------|-------|------|--------|-------|------|--------|-------|------|--------|
| 17  | 938948 | 939128 | -      | CCGAGCCCCTCAGGT | CCGAGCCCCTCAGGT | 17_938948_939128_-1 | 938948  | 939128  | 0.0   | CGGC | CGGC   | 0.0   | CGGC | CGGC   | 0.0   | CGGC | CGGC   |

460

| chr | start  | end    | strand | transcript      | transcript_id   | cds_start           | cds_end | feature | score | name | source | score | name | source | score | name | source |
|-----|--------|--------|--------|-----------------|-----------------|---------------------|---------|---------|-------|------|--------|-------|------|--------|-------|------|--------|
| 17  | 938948 | 939128 | -      | CCGAGCCCCTCAGGT | CCGAGCCCCTCAGGT | 17_938948_939128_-1 | 938948  | 939128  | 0.0   | CGGC | CGGC   | 0.0   | CGGC | CGGC   | 0.0   | CGGC | CGGC   |

461

| chr | start  | end    | strand | transcript      | transcript_id   | cds_start           | cds_end | feature | score | name | source | score | name | source | score | name | source |
|-----|--------|--------|--------|-----------------|-----------------|---------------------|---------|---------|-------|------|--------|-------|------|--------|-------|------|--------|
| 17  | 938948 | 939128 | -      | CCGAGCCCCTCAGGT | CCGAGCCCCTCAGGT | 17_938948_939128_-1 | 938948  | 939128  | 0.0   | CGGC | CGGC   | 0.0   | CGGC | CGGC   | 0.0   | CGGC | CGGC   |

462

| chr | start  | end    | strand | transcript      | transcript_id   | cds_start           | cds_end | feature | score | name | source | score | name | source | score | name | source |
|-----|--------|--------|--------|-----------------|-----------------|---------------------|---------|---------|-------|------|--------|-------|------|--------|-------|------|--------|
| 17  | 938948 | 939128 | -      | CCGAGCCCCTCAGGT | CCGAGCCCCTCAGGT | 17_938948_939128_-1 | 938948  | 939128  | 0.0   | CGGC | CGGC   | 0.0   | CGGC | CGGC   | 0.0   | CGGC | CGGC   |

| SFT | PolyPhen2 | IFT | MutationFactor | MutationAssessor | FATHMM | MetaSVM | Occurrences | hgmd                              | PROVEAN                      | # locus    | type  | ref             | length | amtype            | pscore   | coverage | allele coverage | maf   | gene | transcript | location | function | codon | exon | protein | coding | ift | polyphen | grantham | normalizedat | S000xomes | cosmic | dbnp | drugbank                           | ip                                                                           | chem                                             | ifam                                                                                                           | phospho                                                                         |
|-----|-----------|-----|----------------|------------------|--------|---------|-------------|-----------------------------------|------------------------------|------------|-------|-----------------|--------|-------------------|----------|----------|-----------------|-------|------|------------|----------|----------|-------|------|---------|--------|-----|----------|----------|--------------|-----------|--------|------|------------------------------------|------------------------------------------------------------------------------|--------------------------------------------------|----------------------------------------------------------------------------------------------------------------|---------------------------------------------------------------------------------|
|     |           |     |                |                  |        |         | 12          | 17_7579643_3356_CCCCAGCCCTCCAGT_C | 17_7579643_CCCCAGCCCTCCAGT_C | 17_7579643 | indel | ECCCAGCCCTCCAGG | 16     | CCCCAGCCCTCCAGT/C | 1.00E+10 | 530      | 345,185         | 0.153 | TP93 | NM_005463  | intronic |          |       |      |         |        |     |          |          |              |           |        |      | AMAF=0.3385:EMAF=0.2049:MAF=0.2511 | r5979882:n1787832:n15020764:n14653483:178930088:n81712732:n6651936:n18866738 | 1-(p-ethyl-9H-carbazol-3-yl)-N-methylmethanamine | GO:000515:GO:0030308:GO:0003700:GO:0044212:GO:0009303:GO:0007912:GO:0009792:GO:0001170:PF08561:PF07710:PF00870 | 2.36,0.11,0.88,0.2,0.15,0.39,1.0,1.96,1.18,0.06,0.06,0.46,4.6,38,0.47,0.46,0.38 |

| SFT | PolyPhen2 | IFT | MutationFactor | MutationAssessor | FATHMM | MetaSVM | Occurrences | hgmd                              | PROVEAN                      | # locus    | type  | ref             | length | amtype            | pscore   | coverage | allele coverage | maf   | gene | transcript | location | function | codon | exon | protein | coding | ift | polyphen | grantham | normalizedat | S000xomes | cosmic | dbnp | drugbank                           | ip                                                                           | chem                                             | ifam                                                                                                           | phospho                                                                         |
|-----|-----------|-----|----------------|------------------|--------|---------|-------------|-----------------------------------|------------------------------|------------|-------|-----------------|--------|-------------------|----------|----------|-----------------|-------|------|------------|----------|----------|-------|------|---------|--------|-----|----------|----------|--------------|-----------|--------|------|------------------------------------|------------------------------------------------------------------------------|--------------------------------------------------|----------------------------------------------------------------------------------------------------------------|---------------------------------------------------------------------------------|
|     |           |     |                |                  |        |         | 12          | 17_7579643_3376_CCCCAGCCCTCCAGT_C | 17_7579643_CCCCAGCCCTCCAGT_C | 17_7579643 | indel | ECCCAGCCCTCCAGG | 16     | CCCCAGCCCTCCAGT/C | 1.00E+10 | 2536     | 1831,705        | 0.153 | TP93 | NM_005463  | intronic |          |       |      |         |        |     |          |          |              |           |        |      | AMAF=0.3385:EMAF=0.2049:MAF=0.2511 | r5979882:n1787832:n15020764:n14653483:178930088:n81712732:n6651936:n18866738 | 1-(p-ethyl-9H-carbazol-3-yl)-N-methylmethanamine | GO:000515:GO:0030308:GO:0003700:GO:0044212:GO:0009303:GO:0007912:GO:0009792:GO:0001170:PF08561:PF07710:PF00870 | 2.36,0.11,0.88,0.2,0.15,0.39,1.0,1.96,1.18,0.06,0.06,0.46,4.6,38,0.47,0.46,0.38 |

| SFT | PolyPhen2 | IFT | MutationFactor | MutationAssessor | FATHMM | MetaSVM | Occurrences | hgmd                    | PROVEAN            | # locus    | type | ref | length | amtype  | pscore        | coverage | allele coverage | maf      | gene | transcript | location | function | codon | exon | protein | coding | ift | polyphen | grantham | normalizedat | S000xomes | cosmic | dbnp                                                                                | drugbank                                                                            | ip                                               | chem                                                                                                           | ifam                                                                                                           | phospho        |
|-----|-----------|-----|----------------|------------------|--------|---------|-------------|-------------------------|--------------------|------------|------|-----|--------|---------|---------------|----------|-----------------|----------|------|------------|----------|----------|-------|------|---------|--------|-----|----------|----------|--------------|-----------|--------|-------------------------------------------------------------------------------------|-------------------------------------------------------------------------------------|--------------------------------------------------|----------------------------------------------------------------------------------------------------------------|----------------------------------------------------------------------------------------------------------------|----------------|
|     |           |     |                |                  |        |         | 0           | 17_7579643_3388_A_G     | 17_7579643_A_G     | 17_7579643 | snv  | A   | 1      | CG/C    | 4.073803E-317 | 453      | 201,249,0,1,0   | 0.3985,0 | TP93 | NM_005463  | intronic |          |       |      |         |        |     |          |          |              |           |        | 43787:18869:1268332:1268331:96580:45288:43807:44256:44466:1186925:138626:46058:4808 | r5042522:n56275308                                                                  | 1-(p-ethyl-9H-carbazol-3-yl)-N-methylmethanamine | GO:000515:GO:0030308:GO:0003700:GO:0044212:GO:0009303:GO:0007912:GO:0009792:GO:0001170:PF08561:PF07710:PF00870 | 1.14,0.69,1.38                                                                                                 |                |
|     |           |     |                |                  |        |         | 0           | 17_7579643_3344_CGG_CGC | 17_7579643_CGG_CGC | 17_7579643 | snv  | CGG | 1      | CGG/CGC | 4.073803E-317 | 453      | 201,249,0,1,0   | 0.3985,0 | TP93 | NM_005463  | intronic |          |       |      |         |        |     |          |          |              |           |        |                                                                                     | 43787:18869:1268332:1268331:96580:45288:43807:44256:44466:1186925:138626:46058:4808 | r5042522:n56275308                               | 1-(p-ethyl-9H-carbazol-3-yl)-N-methylmethanamine                                                               | GO:000515:GO:0030308:GO:0003700:GO:0044212:GO:0009303:GO:0007912:GO:0009792:GO:0001170:PF08561:PF07710:PF00870 | 1.14,0.69,1.38 |
