# Supplementary material for: RNA-Seq reveals the existence of a CDKN1C-E2F1-TP53 axis that is altered in human T-cell lymphoblastic lymphomas
Source: PubMed Central journal article supplement (PMC5902834; doi:10.1186/s12885-018-4304-y), 2018-04-16
Supplement: 12885_2018_4304_MOESM8_ESM.pdf [file 12885_2018_4304_MOESM8_ESM.pdf]

**Supplementary Table 6. MicroRNA regulation of CDKN1C, E2F1 and TP53 genes in T-TLBLs of the exploratory cohort by RNA-Seq.**

| miRNA           | Gene target | Sample   |          |          |          |           |          |          |           |           |
|-----------------|-------------|----------|----------|----------|----------|-----------|----------|----------|-----------|-----------|
|                 |             | control  | 840      | 460      | 521      | 238       | 192      | 346      | 408       | 554       |
| hsa-miR-221-3p  | CDKN1C      | 1600,02  | 17271,02 | 3400,21  | 2753,92  | 4469,38   | 2502,02  | 2895,39  | 3757,41   | 1870,87   |
| hsa-miR-222-3p  | CDKN1C      | 1574,66  | 9816,38  | 1666,03  | 2801,27  | 4123,51   | 3153,06  | 1265,65  | 2065,70   | 1301,16   |
| hsa-miR-17-5p   | E2F1        | 1761,14  | 9076,96  | 1366,54  | 2134,54  | 2517,03   | 1581,99  | 1937,49  | 4565,21   | 4401,98   |
| hsa-miR-203a    | E2F1        | 873,42   | 61,06    | 193,68   | 10,24    | 2,52      | 7,02     | 17,34    | 6,04      | 9,16      |
| hsa-miR-205-5p  | E2F1        | 15153,48 | 442,67   | 48,42    | 3,84     | 9,26      | 8,58     | 10,84    | 6,65      | 12,21     |
| hsa-miR-21-5p   | E2F1        | 19124,87 | 87901,11 | 52319,42 | 48929,43 | 104336,68 | 60352,50 | 38077,88 | 82151,95  | 68850,72  |
| hsa-miR-223-3p  | E2F1        | 589,19   | 8004,17  | 5371,11  | 854,84   | 700,16    | 379,71   | 1165,96  | 1749,11   | 507,65    |
| hsa-miR-20a-5p  | E2F1        | 3981,82  | 11721,41 | 3507,81  | 5249,34  | 2974,82   | 3081,33  | 5056,10  | 3728,41   | 3932,99   |
| hsa-miR-331-3p  | E2F1        | 183,01   | 501,90   | 242,10   | 168,92   | 284,44    | 222,21   | 134,37   | 431,99    | 379,46    |
| hsa-miR-10b-5p  | TP53        | 44169,67 | 64108,43 | 95854,97 | 62190,99 | 156031,24 | 63471,25 | 55363,54 | 181389,58 | 119943,99 |
| hsa-miR-125b-5p | TP53        | 3857,72  | 1020,29  | 898,47   | 836,93   | 1813,50   | 1067,39  | 981,75   | 1074,24   | 1030,55   |
| hsa-miR-150-5p  | TP53        | 12949,38 | 3587,19  | 33399,49 | 39485,22 | 33292,75  | 6525,21  | 23388,53 | 14230,92  | 2063,14   |
| hsa-miR-200a-3p | TP53        | 1181,61  | 68,39    | 8,97     | 8,96     | 12,62     | 7,02     | 15,17    | 3,63      | 2,03      |
| hsa-miR-30e-5p  | TP53        | 32594,02 | 46065,62 | 16289,07 | 22387,12 | 5830,14   | 23312,66 | 39709,78 | 7720,85   | 8103,02   |
| hsa-miR-375     | TP53        | 672,95   | 79,99    | 41,25    | 5,12     | 14,31     | 5,46     | 10,84    | 64,04     | 0,00      |
| hsa-miR-19b-3p  | TP53        | 5682,11  | 21135,42 | 5772,82  | 6178,40  | 3916,50   | 4298,42  | 6551,48  | 6663,53   | 4720,40   |
| hsa-miR-214-3p  | TP53        | 180,56   | 52,51    | 127,33   | 97,26    | 197,76    | 222,21   | 140,87   | 238,65    | 156,67    |
| hsa-let-7a-3p   | TP53        | 98,13    | 249,73   | 236,72   | 268,74   | 128,75    | 293,94   | 312,08   | 346,80    | 283,83    |
| hsa-let-7b-3p   | TP53        | 18,14    | 50,68    | 285,14   | 227,79   | 120,34    | 252,62   | 212,39   | 314,18    | 260,44    |
| hsa-let-7f-1-3p | TP53        | 19,23    | 7,94     | 69,94    | 117,73   | 56,38     | 132,55   | 93,19    | 91,84     | 120,04    |
| hsa-let-7b-5p   | TP53        | 1169,81  | 2389,22  | 8798,21  | 5399,07  | 5137,56   | 6051,94  | 6601,32  | 10352,07  | 7025,67   |
| hsa-let-7d-5p   | TP53        | 1370,14  | 768,73   | 2756,39  | 2794,87  | 3385,49   | 2473,95  | 2828,21  | 2420,96   | 3223,91   |
| hsa-let-7f-5p   | TP53        | 31321,99 | 32829,96 | 93654,52 | 95763,99 | 116804,84 | 67506,92 | 66149,74 | 67698,08  | 52563,30  |
| hsa-let-7g-5p   | TP53        | 11292,38 | 10671,20 | 29995,70 | 29832,43 | 41703,03  | 18002,21 | 25570,91 | 27950,71  | 17854,11  |
| hsa-let-7i-5p   | TP53        | 7199,97  | 8728,93  | 13338,99 | 15617,49 | 19046,43  | 14907,63 | 13154,96 | 22120,95  | 11302,51  |
| hsa-let-7c-5p   | TP53        | 4451,18  | 1404,35  | 853,64   | 793,42   | 1436,50   | 328,25   | 1083,60  | 759,46    | 1438,50   |

Read counts of deregulated miRNA by gene in each sample from the exploratory cohort are shown.
