# Supplementary material for: RNA-Seq reveals the existence of a CDKN1C-E2F1-TP53 axis that is altered in human T-cell lymphoblastic lymphomas
Source: Springer Nature journal article supplement (doi:10.1186/s12885-018-4304-y), 2018-04-16
Supplement: MOESM4 [file 15703290]

**Supplementary Table 2. Description of primers used in qRT-PCR, Targeted gene deep sequencing, Sanger sequencing and Methylation-Specific PCR.**

**Primer sequences qRT-PCR**

| Target gene          | Primer sequences (5'-3')                       | Size |
|----------------------|------------------------------------------------|------|
| E2F1 <sup>1</sup>    | CATCCAGGAGGTCACTTCTG<br>GACAACAGCGGTCTTGCTC    | 144  |
| P57 <sup>2</sup>     | GGCCTGTGATCCGATTTCTTC<br>GGGTCTGCTCCACCGAG     | 126  |
| TAp53 <sup>3</sup>   | CGCAGTCAGATCCTAGCGTC<br>CTGGACCTGGGTCTTCAGTG   | 171  |
| Δ133p53 <sup>4</sup> | GGTTGCAGGAGGTGCTTACAC<br>GTTGAGGGCAGGGGAGTACTG | 128  |
| β2μG                 | CCAGCAGAGAATGGAAAGTC<br>CGAGACATGTAAGCAGCATC   | 285  |
| β actin              | CAGGCACCAGGGCGTG<br>GTGAGGATGCCTCTTGTCT        | 84   |

**MystiCQ™ microRNA qPCR**

| Target                       | SIGMA Reference |
|------------------------------|-----------------|
| Universal PCR Primer         | MIRUP           |
| Assay Primer hsa-miR-25-3p   | MIRAP00059      |
| Assay Primer hsa-miR-200a-3p | MIRAP00247      |
| Assay Primer hsa-miR-203     | MIRAP00255      |
| Assay Primer hsa-miR-205-5p  | MIRAP00257      |
| Assay Primer hsa-miR-221-3p  | MIRAP00277      |
| Assay Primer hsa-miR-222-3p  | MIRAP00279      |
| Assay Primer hsa-miR-375     | MIRAP00360      |
| Control Primer SNORD48       | MIRCP00007      |

**Primer sequences for Sanger DNA sequencing**

| Target Gene | Region                | Sequence 5'-3'                               | Size |
|-------------|-----------------------|----------------------------------------------|------|
| TP53        | Exon 4 <sup>5</sup>   | ACTGCTCTTTACCCATCTAC<br>TCATGGAAGCCAGCCCTCAG | 332  |
|             | Exon 5                | GGGTAGACGCCAACTCTCTC<br>CCAGCTGCTCACCATCGCTA | 340  |
|             | Exon 6 <sup>6,7</sup> | TGGTTGCCAGGGTCCCC<br>CGGAGGGCCACTGACAACC     | 223  |
|             | Exon 7 <sup>8</sup>   | TGCCACAGGTCTCCCAAGG<br>AGTGTGCAGGGTGGCAAGTG  | 196  |
|             | Exon 8                | GCTTTGAGGTGCGTGTGTTGT<br>CTGAGGCATAACTGCACCT | 170  |

\* European Molecular Biology Laboratory (EMBL) Accession No. X54156.1 (p53 gene sequence).

**Primer sequences for Methylation-Specific PCR and Bisulfite Genomic Sequencing**

| Target Gene | Sequence 5'-3'     | Size                                                  |     |
|-------------|--------------------|-------------------------------------------------------|-----|
| P57         | MSP-U-F<br>MSP-U-R | GTTGAATGTTGAGGATTAGAATTGT<br>CAAAAAACAACTAACAACCACCAC | 203 |
|             | MSP-M-F<br>MSP-M-R | AGTTGAACGTCGAGGATTAGAATC<br>GAAAAACGAATAACAACCACCG    | 203 |
|             | BS-F<br>BS-R       | GAGGATTAGAATYGTGGGATT<br>AACTAACAACCACRCRA            | 184 |

**References:**

1. Wang P, Alvarez-Perez JC, Felsenfeld DP, et al. A high-throughput chemical screen reveals that harmine-mediated inhibition of DYRK1A increases human pancreatic beta cell replication. *Nat Med.* 2015;21(4):383-388.
2. Ueberberg S, Tannapfel A, Schenker P, et al. Differential expression of cell-cycle regulators in human beta-cells derived from insulinoma tissue. *Metabolism.* 2016;65(5):736-746.
3. Nutthasirikul N, Limpiboon T, Leelayuwat C, Patrakitkomjorn S, Jearanaikoon P. Ratio disruption of the 133p53 and TAp53 isoform equilibrium correlates with poor clinical outcome in intrahepatic cholangiocarcinoma. *Int J Oncol.* 2013;42(4):1181-1188.
4. Ohgaki H, Dessen P, Jourde B, et al. Genetic pathways to glioblastoma: a population-based study. *Cancer Res.* 2004;64(19):6892-6899.
5. Bharaj BS, Angelopoulou K, Diamandis EP. Rapid sequencing of the p53 gene with a new automated DNA sequencer. *Clin Chem.* 1998;44(7):1397-1403.
6. Serakinci N, Christensen R, Graakjaer J, et al. Ectopically hTERT expressing adult human mesenchymal stem cells are less radiosensitive than their telomerase negative counterpart. *Exp Cell Res.* 2007;313(5):1056-1067.
7. Millikan R, Hulka B, Thor A, et al. p53 mutations in benign breast tissue. *J Clin Oncol.* 1995;13(9):2293-2300.
