# Supplementary material for: RNA-Seq reveals the existence of a CDKN1C-E2F1-TP53 axis that is altered in human T-cell lymphoblastic lymphomas
Source: Springer Nature journal article supplement (doi:10.1186/s12885-018-4304-y), 2018-04-16
Supplement: MOESM9 [file 15703290]

Supplementary Table 7. Validation analysis by qRT-PCR of those miRNA significantly deregulated according with RNA-Seq analysis in the exploratory and extended cohort of T-LBL samples.

| Sample Cohort      | Sample          | miRNA_id        | gene symbol target | Housekeeping | 2 <sup>Δ</sup> -Dct 2_1_control | 2 <sup>Δ</sup> -Dct 2_2_tumor | P value | Norm_1 | Norm_2    | log2FC    |
|--------------------|-----------------|-----------------|--------------------|--------------|---------------------------------|-------------------------------|---------|--------|-----------|-----------|
| Exploratory cohort | 554             | hsa-miR-200a-3p | TP53               | miR-SNORD48  | 147,380                         | 0,080                         | 0,000   | 1,000  | 0,001     | -10,970   |
|                    |                 | hsa-miR-203a    | E2F1               | miR-SNORD48  | 223,320                         | 53,490                        | 0,017   | 1,000  | 0,239     | -2,064    |
|                    |                 | hsa-miR-205-5p  | E2F1               | miR-SNORD48  | 311,740                         | 1,920                         | 0,001   | 1,000  | 0,006     | -7,356    |
|                    |                 | hsa-miR-221-3p  | CDKN1C             | miR-SNORD48  | 1,070                           | 1,410                         | 0,853   | 1,000  | 1,317     | 0,397     |
|                    |                 | hsa-miR-222-3p  | CDKN1C             | miR-SNORD48  | 1,390                           | 0,180                         | 0,022   | 1,000  | 0,129     | -2,954    |
|                    | hsa-miR-375     | TP53            | miR-SNORD48        | 3,460        | 17,240                          | 0,021                         | 1,000   | 4,982  | 2,317     |           |
|                    | 238             | hsa-miR-200a-3p | TP53               | miR-SNORD48  | 147,380                         | 0,750                         | 0,000   | 1,000  | 0,005     | -6,643    |
|                    |                 | hsa-miR-203a    | E2F1               | miR-SNORD48  | 223,320                         | 0,370                         | 0,016   | 1,000  | 0,002     | -9,287    |
|                    |                 | hsa-miR-205-5p  | E2F1               | miR-SNORD48  | 311,740                         | 0,790                         | 0,011   | 1,000  | 0,003     | -8,643    |
|                    |                 | hsa-miR-221-3p  | CDKN1C             | miR-SNORD48  | 1,070                           | 1,180                         | 0,613   | 1,000  | 1,103     | 0,028     |
|                    |                 | hsa-miR-222-3p  | CDKN1C             | miR-SNORD48  | 1,390                           | 2,450                         | 0,181   | 1,000  | 1,763     | 0,817     |
|                    | hsa-miR-375     | TP53            | miR-SNORD48        | 3,460        | 0,820                           | 0,001                         | 1,000   | 0,237  | -2,077    |           |
|                    | 408             | hsa-miR-200a-3p | TP53               | miR-SNORD48  | 147,380                         | 0,600                         | 0,000   | 1,000  | 0,004     | -7,930    |
|                    |                 | hsa-miR-203a    | E2F1               | miR-SNORD48  | 223,320                         | 0,960                         | 0,016   | 1,000  | 0,004     | -7,895    |
|                    |                 | hsa-miR-205-5p  | E2F1               | miR-SNORD48  | 311,740                         | 1,850                         | 0,011   | 1,000  | 0,006     | -7,405    |
|                    |                 | hsa-miR-221-3p  | CDKN1C             | miR-SNORD48  | 1,070                           | 0,430                         | 0,066   | 1,000  | 0,402     | -1,315    |
|                    |                 | hsa-miR-222-3p  | CDKN1C             | miR-SNORD48  | 1,390                           | 1,455                         | 0,455   | 1,000  | 0,921     | -0,119    |
|                    | hsa-miR-375     | TP53            | miR-SNORD48        | 3,460        | 1,250                           | 0,003                         | 1,000   | 0,361  | -1,469    |           |
|                    | 192             | hsa-miR-200a-3p | TP53               | miR-SNORD48  | 147,380                         | 0,760                         | 0,000   | 1,000  | 0,005     | -7,615    |
|                    |                 | hsa-miR-203a    | E2F1               | miR-SNORD48  | 223,320                         | 0,610                         | 0,016   | 1,000  | 0,003     | -8,533    |
|                    |                 | hsa-miR-205-5p  | E2F1               | miR-SNORD48  | 311,740                         | 0,100                         | 0,011   | 1,000  | 0,000     | -11,700   |
|                    |                 | hsa-miR-221-3p  | CDKN1C             | miR-SNORD48  | 1,070                           | 0,720                         | 0,011   | 1,000  | 0,518     | -0,949    |
|                    |                 | hsa-miR-222-3p  | CDKN1C             | miR-SNORD48  | 1,390                           | 0,440                         | 0,012   | 1,000  | 0,316     | -1,662    |
|                    | hsa-miR-375     | TP53            | miR-SNORD48        | 3,460        | 1,110                           | 0,022                         | 1,000   | 0,321  | -1,639    |           |
|                    | 460             | hsa-miR-200a-3p | TP53               | miR-SNORD48  | 147,380                         | 0,000                         | 0,000   | 1,000  | 0,000     | -22,250   |
|                    |                 | hsa-miR-203a    | E2F1               | miR-SNORD48  | 223,320                         | 3,110                         | 0,017   | 1,000  | 0,014     | -6,158    |
|                    |                 | hsa-miR-205-5p  | E2F1               | miR-SNORD48  | 311,740                         | 0,880                         | 0,011   | 1,000  | 0,003     | -8,381    |
|                    |                 | hsa-miR-221-3p  | CDKN1C             | miR-SNORD48  | 1,070                           | 0,390                         | 0,019   | 1,000  | 0,364     | -1,458    |
|                    |                 | hsa-miR-222-3p  | CDKN1C             | miR-SNORD48  | 1,390                           | 0,730                         | 0,036   | 1,000  | 0,525     | -0,929    |
|                    | hsa-miR-375     | TP53            | miR-SNORD48        | 3,460        | 0,450                           | 0,024                         | 1,000   | 0,130  | -2,943    |           |
|                    | 346             | hsa-miR-200a-3p | TP53               | miR-SNORD48  | 147,380                         | 0,610                         | 0,000   | 1,000  | 0,004     | -7,930    |
|                    |                 | hsa-miR-203a    | E2F1               | miR-SNORD48  | 223,320                         | 0,690                         | 0,016   | 1,000  | 0,003     | -8,333    |
|                    |                 | hsa-miR-205-5p  | E2F1               | miR-SNORD48  | 311,740                         | 6,920                         | 0,011   | 1,000  | 0,022     | -5,506    |
|                    |                 | hsa-miR-221-3p  | CDKN1C             | miR-SNORD48  | 1,070                           | 1,230                         | 0,713   | 1,000  | 1,149     | 0,200     |
|                    |                 | hsa-miR-222-3p  | CDKN1C             | miR-SNORD48  | 1,390                           | 1,430                         | 0,681   | 1,000  | 1,029     | 0,041     |
|                    | hsa-miR-375     | TP53            | miR-SNORD48        | 3,460        | 2,010                           | 0,044                         | 1,000   | 0,581  | -0,783    |           |
|                    | 840             | hsa-miR-200a-3p | TP53               | miR-SNORD48  | 147,380                         | 0,130                         | 0,000   | 1,000  | 0,001     | -10,120   |
|                    |                 | hsa-miR-203a    | E2F1               | miR-SNORD48  | 223,320                         | 0,070                         | 0,016   | 1,000  | 0,000     | -11,700   |
|                    |                 | hsa-miR-205-5p  | E2F1               | miR-SNORD48  | 311,740                         | 0,330                         | 0,011   | 1,000  | 0,001     | -9,828    |
|                    |                 | hsa-miR-221-3p  | CDKN1C             | miR-SNORD48  | 1,070                           | 2,010                         | 0,366   | 1,000  | 1,878     | 0,909     |
|                    |                 | hsa-miR-222-3p  | CDKN1C             | miR-SNORD48  | 1,390                           | 1,230                         | 0,541   | 1,000  | 0,884     | -0,179    |
|                    | hsa-miR-375     | TP53            | miR-SNORD48        | 3,460        | 0,250                           | 0,005                         | 1,000   | 0,072  | -3,795    |           |
|                    | 521             | hsa-miR-200a-3p | TP53               | miR-SNORD48  | 147,380                         | 1,044                         | 0,000   | 1,000  | 0,007     | -7,158    |
|                    |                 | hsa-miR-203a    | E2F1               | miR-SNORD48  | 223,320                         | 1,280                         | 0,016   | 1,000  | 0,006     | -7,381    |
|                    |                 | hsa-miR-205-5p  | E2F1               | miR-SNORD48  | 311,740                         | 0,529                         | 0,011   | 1,000  | 0,002     | -8,965    |
| hsa-miR-221-3p     |                 | CDKN1C          | miR-SNORD48        | 1,070        | 1,040                           | 0,593                         | 1,000   | 0,972  | -0,041    |           |
| hsa-miR-222-3p     |                 | CDKN1C          | miR-SNORD48        | 1,390        | 0,990                           | 0,098                         | 1,000   | 0,712  | -0,490    |           |
| hsa-miR-375        | TP53            | miR-SNORD48     | 3,460              | 0,405        | 0,003                           | 1,000                         | 0,118   | -3,083 |           |           |
| Extended cohort    | 829             | hsa-miR-200a-3p | TP53               | miR-SNORD48  | 147,380                         | 0,820                         | 0,000   | 1,000  | 0,006     | -7,506    |
|                    |                 | hsa-miR-203a    | E2F1               | miR-SNORD48  | 223,320                         | 0,760                         | 0,016   | 1,000  | 0,003     | -8,200    |
|                    |                 | hsa-miR-205-5p  | E2F1               | miR-SNORD48  | 311,740                         | 0,350                         | 0,011   | 1,000  | 0,001     | -9,828    |
|                    |                 | hsa-miR-221-3p  | CDKN1C             | miR-SNORD48  | 1,070                           | 3,430                         | 0,006   | 1,000  | 3,205     | 1,680     |
|                    |                 | hsa-miR-222-3p  | CDKN1C             | miR-SNORD48  | 1,390                           | 2,580                         | 0,177   | 1,000  | 1,856     | 0,892     |
|                    | hsa-miR-375     | TP53            | miR-SNORD48        | 3,460        | 0,600                           | 0,003                         | 1,000   | 0,173  | -2,531    |           |
|                    | 188             | hsa-miR-200a-3p | TP53               | miR-SNORD48  | 147,380                         | 0,990                         | 0,000   | 1,000  | 0,007     | -7,221    |
|                    |                 | hsa-miR-203a    | E2F1               | miR-SNORD48  | 223,320                         | 0,640                         | 0,016   | 1,000  | 0,003     | -8,480    |
|                    |                 | hsa-miR-205-5p  | E2F1               | miR-SNORD48  | 311,740                         | 1,160                         | 0,011   | 1,000  | 0,004     | -8,078    |
|                    |                 | hsa-miR-221-3p  | CDKN1C             | miR-SNORD48  | 1,070                           | 1,250                         | 0,803   | 1,000  | 1,168     | 0,224     |
|                    |                 | hsa-miR-222-3p  | CDKN1C             | miR-SNORD48  | 1,390                           | 0,800                         | 2,811   | 1,000  | 0,575     | -0,798    |
|                    | hsa-miR-375     | TP53            | miR-SNORD48        | 3,460        | 0,530                           | 0,022                         | 1,000   | 0,153  | -2,708    |           |
|                    | 080             | hsa-miR-200a-3p | TP53               | miR-SNORD48  | 147,380                         | 0,370                         | 0,000   | 1,000  | 0,003     | -8,643    |
|                    |                 | hsa-miR-203a    | E2F1               | miR-SNORD48  | 223,320                         | 0,520                         | 0,016   | 1,000  | 0,002     | -8764,000 |
|                    |                 | hsa-miR-205-5p  | E2F1               | miR-SNORD48  | 311,740                         | 1,030                         | 0,011   | 1,000  | 0,003     | -8,243    |
|                    |                 | hsa-miR-221-3p  | CDKN1C             | miR-SNORD48  | 1,070                           | 0,660                         | 0,124   | 1,000  | 0,616     | -0,698    |
|                    |                 | hsa-miR-222-3p  | CDKN1C             | miR-SNORD48  | 1,390                           | 3,790                         | 0,055   | 1,000  | 2,726     | 1,446     |
|                    | hsa-miR-375     | TP53            | miR-SNORD48        | 3,460        | 0,430                           | 0,001                         | 1,000   | 0,124  | -3011,000 |           |
|                    | 135             | hsa-miR-200a-3p | TP53               | miR-SNORD48  | 147,380                         | 0,100                         | 0,000   | 1,000  | 0,001     | -10,480   |
|                    |                 | hsa-miR-203a    | E2F1               | miR-SNORD48  | 223,320                         | 0,080                         | 0,016   | 1,000  | 0,000     | -11,287   |
|                    |                 | hsa-miR-205-5p  | E2F1               | miR-SNORD48  | 311,740                         | 1,010                         | 0,011   | 1,000  | 0,003     | -8,287    |
|                    |                 | hsa-miR-221-3p  | CDKN1C             | miR-SNORD48  | 1,070                           | 0,170                         | 0,046   | 1,000  | 0,158     | -2,662    |
|                    |                 | hsa-miR-222-3p  | CDKN1C             | miR-SNORD48  | 1,390                           | 0,300                         | 0,016   | 1,000  | 0,215     | -2,217    |
|                    | hsa-miR-375     | TP53            | miR-SNORD48        | 3,460        | 1,620                           | 0,011                         | 1,000   | 0,468  | -1,095    |           |
|                    | 104             | hsa-miR-200a-3p | TP53               | miR-SNORD48  | 147,380                         | 0,290                         | 0,000   | 1,000  | 0,002     | -9,039    |
|                    |                 | hsa-miR-203a    | E2F1               | miR-SNORD48  | 223,320                         | 0,470                         | 0,016   | 1,000  | 0,002     | -8,895    |
|                    |                 | hsa-miR-205-5p  | E2F1               | miR-SNORD48  | 311,740                         | 0,720                         | 0,011   | 1,000  | 0,002     | -8,965    |
|                    |                 | hsa-miR-221-3p  | CDKN1C             | miR-SNORD48  | 1,070                           | 0,630                         | 0,122   | 1,000  | 0,588     | -0,766    |
|                    |                 | hsa-miR-222-3p  | CDKN1C             | miR-SNORD48  | 1,390                           | 0,690                         | 0,073   | 1,000  | 0,496     | -1,011    |
|                    | hsa-miR-375     | TP53            | miR-SNORD48        | 3,460        | 1,540                           | 0,079                         | 1,000   | 0,445  | -1,168    |           |
|                    | 038             | hsa-miR-200a-3p | TP53               | miR-SNORD48  | 147,380                         | 92,570                        | 0,024   | 1,000  | 0,628     | -0,671    |
|                    |                 | hsa-miR-203a    | E2F1               | miR-SNORD48  | 223,320                         | 67,330                        | 0,028   | 1,000  | 0,301     | -1,732    |
|                    |                 | hsa-miR-205-5p  | E2F1               | miR-SNORD48  | 311,740                         | 87,720                        | 0,025   | 1,000  | 0,281     | -1,831    |
|                    |                 | hsa-miR-221-3p  | CDKN1C             | miR-SNORD48  | 1,070                           | 0,460                         | 0,078   | 1,000  | 0,429     | -1,221    |
|                    |                 | hsa-miR-222-3p  | CDKN1C             | miR-SNORD48  | 1,390                           | 1,250                         | 0,437   | 1,000  | 0,899     | -0,153    |
|                    | hsa-miR-375     | TP53            | miR-SNORD48        | 3,460        | 6,310                           | 0,030                         | 1,000   | 1,823  | 0,866     |           |
|                    | 101             | hsa-miR-200a-3p | TP53               | miR-SNORD48  | 147,380                         | 0,060                         | 0,000   | 1,000  | 0,000     | -11,287   |
|                    |                 | hsa-miR-203a    | E2F1               | miR-SNORD48  | 223,320                         | 0,050                         | 0,016   | 1,000  | 0,000     | -12,287   |
|                    |                 | hsa-miR-205-5p  | E2F1               | miR-SNORD48  | 311,740                         | 0,003                         | 0,011   | 1,000  | 0,000     | -16,668   |
|                    |                 | hsa-miR-221-3p  | CDKN1C             | miR-SNORD48  | 1,070                           | 0,740                         | 0,160   | 1,000  | 0,691     | -0,533    |
|                    |                 | hsa-miR-222-3p  | CDKN1C             | miR-SNORD48  | 1,390                           | 1,420                         | 0,949   | 1,000  | 1,021     | 0,029     |
|                    | hsa-miR-375     | TP53            | miR-SNORD48        | 3,460        | 0,230                           | 0,006                         | 1,000   | 0,066  | -3921,000 |           |
|                    | 209             | hsa-miR-200a-3p | TP53               | miR-SNORD48  | 147,380                         | 0,510                         | 0,000   | 1,000  | 0,003     | -8,200    |
|                    |                 | hsa-miR-203a    | E2F1               | miR-SNORD48  | 223,320                         | 0,270                         | 0,016   | 1,000  | 0,001     | -9,702    |
|                    |                 | hsa-miR-205-5p  | E2F1               | miR-SNORD48  | 311,740                         | 0,270                         | 0,011   | 1,000  | 0,001     | -10,117   |
| hsa-miR-221-3p     |                 | CDKN1C          | miR-SNORD48        | 1,070        | 4,080                           | 0,016                         | 1,000   | 3,813  | 1,931     |           |
| hsa-miR-222-3p     |                 | CDKN1C          | miR-SNORD48        | 1,390        | 3,540                           | 0,048                         | 1,000   | 2,546  | 1348,000  |           |
| hsa-miR-375        | TP53            | miR-SNORD48     | 3,460              | 1,980        | 0,015                           | 1,000                         | 0,572   | -0,806 |           |           |
| 639                | hsa-miR-200a-3p | TP53            | miR-SNORD48        | 147,380      | 0,080                           | 0,000                         | 1,000   | 0,001  | -10,850   |           |
|                    | hsa-miR-203a    | E2F1            | miR-SNORD48        | 223,320      | 73,530                          | 0,017                         | 1,000   | 0,328  | -1,608    |           |
|                    | hsa-miR-205-5p  | E2F1            | miR-SNORD48        | 311,740      | 0,500                           | 0,001                         | 1,000   | 0,002  | -8,965    |           |
|                    | hsa-miR-221-3p  | CDKN1C          | miR-SNORD48        | 1,070        | 2,910                           | 0,024                         | 1,000   | 2,719  | 1,443     |           |
|                    | hsa-miR-222-3p  | CDKN1C          | miR-SNORD48        | 1,390        | 0,750                           | 0,026                         | 1,000   | 0,539  | -0,891    |           |
| hsa-miR-375        | TP53            | miR-SNORD48     | 3,460              | 3,090        | 0,036                           | 1,000                         | 0,630   | -0,163 |           |           |
| 001                | hsa-miR-200a-3p | TP53            | miR-SNORD48        | 147,380      | 0,080                           | 0,000                         | 1,000   | 0,001  | -10,850   |           |
|                    | hsa-miR-203a    | E2F1            | miR-SNORD48        | 223,320      | 47,570                          | 0,023                         | 1,000   | 0,213  | -2,231    |           |
|                    | hsa-miR-205-5p  | E2F1            | miR-SNORD48        |              |                                 |                               |         |        |           |           |
